# Supplementary material
Source: PubMed Central journal article supplement (PMC4063679)
Supplement: NIHMS596756-supplement-supplement.pdf [file NIHMS596756-supplement-supplement.pdf]

## Supplemental Information

### Structural Basis for Complex Formation

#### between Human IRSp53 and the Translocated Intimin

#### Receptor Tir of Enterohemorrhagic *E. coli*

Jens C. de Groot, Kai Schlüter, Yvonne Carius, Claudia Quedenau, Didier Vingadassalom, Jan Faix, Stefanie M. Weiss, Joachim Reichelt, Christine Standfuß-Gabisch, Cammie F. Lesser, John M. Leong, Dirk W. Heinz, Konrad Büsow, and Theresia E.B. Stradal

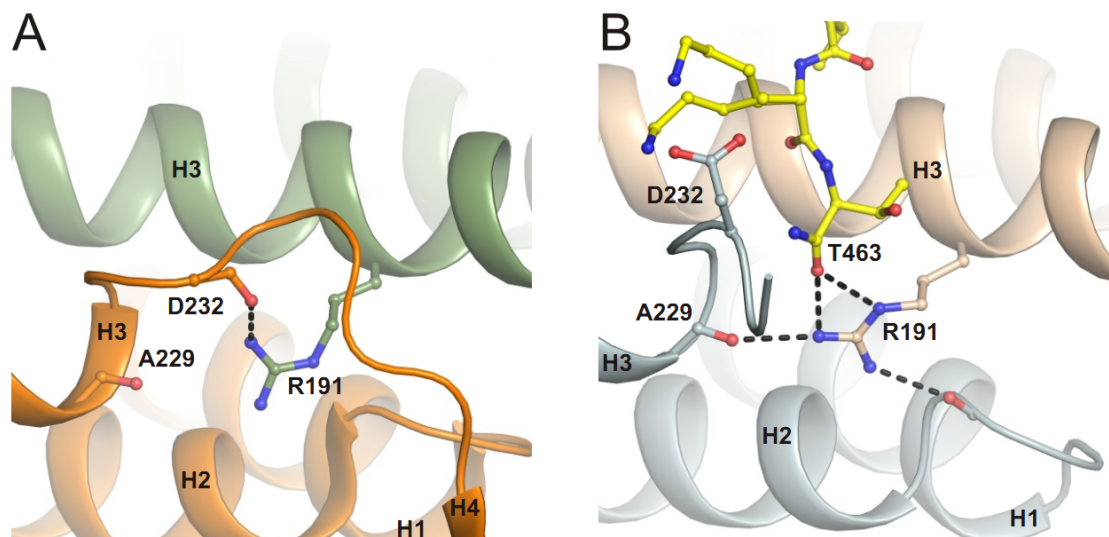

Figure S1, related to Figure 3: Comparison of helix H4 in free I-BAR<sub>IRSp53</sub> and in the peptide complex. (A) In the free structure (PDB 1Y2O), Arg191 of one monomer (green) binds to the loop linking helix H3 and helix H4 of the other monomer (orange) and thereby stabilizes helix H4 adjacent to the dimer. In the structure of the complex (B), the peptide's terminal amide group (yellow) binds to the guanidinium group of Arg191 of one I-BAR monomer (wheat), leading to a conformational change of helix H4 and the preceding loop of the other monomer (blue).

**A**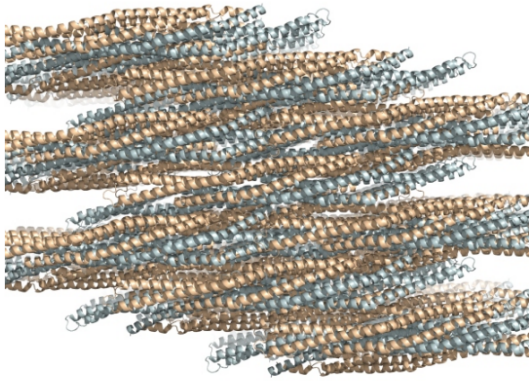**B**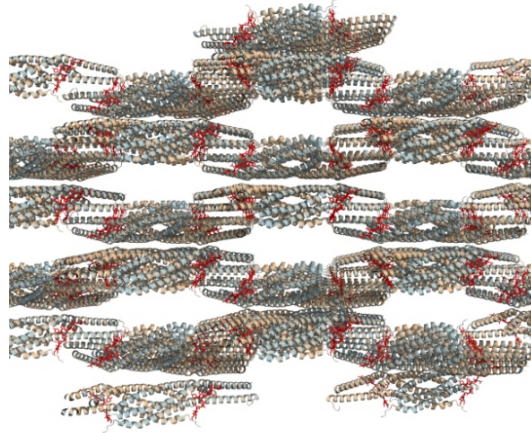

Figure S2, related to Figure 1: Different crystal packing of free versus peptide loaded I-BAR domain of IRSp53. While the individual fold of each I-BAR is highly similar, crystal packing of free versus peptide bound I-BARs significantly differs. (A) Crystal packing according to Millard *et al.* of the free I-BAR (PDB entry 1Y2O). I-BARs are densely packed. The two protomers of each dimer are in cyan and wheat, respectively. (B) Crystal packing of the peptide loaded I-BAR displays a more loose array, explaining the undetectability of the loop between H2 and H3 and of entire H4. Tir peptides are shown in red.

**Table S1: primers used in this study**

| Primers                 | 5' Sequence 3'                    |
|-------------------------|-----------------------------------|
| pGEX fwd (I-BAR)        | GGGCTGGCAAGCCACGTTTGGTG           |
| I-BAR rev               | GACTGCGGCCGCTCAGTTGCTGGCCACCTGC   |
| L28E fwd                | CTAGCgaaCGGAACTTCATaGCCATGGG      |
| L28E rev                | GTTCCGttcGCTAGGGTTGAAiTGCTCCATG   |
| K108 fwd                | GCAGCTGGAGCAGgcGGTGGAGCTGGACT     |
| K108 rev                | AGTCCAGCTCCACCGCCTGCTCCAGCTGC     |
| R193S fwd               | GAGCGCAGGaGCTTCTGCTTctTGGTGGAGAAG |
| R193S rev               | CTTCTCCACCAGGAAGCAGAAGCTCCTGCGCTC |
| F196A fwd               | GAGCGCAGGCGCTTCTGtgcaCTGGTGGAGAAG |
| F196A rev               | GAGCGCAGGCGCTTCTGtgcaCTGGTGGAGAAG |
|                         |                                   |
| Tir <sub>EPEC</sub> fwd | GAGAGGATCCGTTGAAAGCAATGCACAGGCGC  |
| Tir <sub>EPEC</sub> rev | GAGAGAATTCTTAAACGAAACGTAAGTGGTCCC |
| Tir <sub>HEC</sub> fwd  | GAGAAGATCTATTGAAAATAATGCTCAGGCG   |
| Tir <sub>HEC</sub> rev  | GAGAGAATTCTTAGACGAAACGATGGGATCCC  |

**Table S2: constructs used in this study**

| construct                           | entry                          | Residues (AA) | vectors                  |
|-------------------------------------|--------------------------------|---------------|--------------------------|
| I-BAR <sub>IRSp53</sub> wt          | NM_017450                      | 1-250         | pQTEV, pEGFP-C1          |
| I-BAR <sub>IRSp53</sub> L28E        | derivative of above            | as above      | pQTEV, pEGFP-C1          |
| I-BAR <sub>IRSp53</sub> K108A       | derivative of above            | as above      | pQTEV, pEGFP-C1          |
| I-BAR <sub>IRSp53</sub> R193S       | derivative of above            | as above      | pQTEV, pEGFP-C1          |
| I-BAR <sub>IRSp53</sub> F196A       | derivative of above            | as above      | pQTEV, pEGFP-C1          |
| I-BAR <sub>IRSp53</sub> K108A/R193S | derivative of above            | as above      | pQTEV, pEGFP-C1          |
| I-BAR <sub>IRSp53</sub> K108A/F196A | derivative of above            | as above      | pQTEV, pEGFP-C1          |
|                                     |                                |               |                          |
| Tir <sub>EPEC</sub> C-terminus      | NC_011601<br>(4113830-4115482) | 337-551       | pEGFP-C1                 |
| Tir <sub>HEC</sub> C-terminus       | NC_002655<br>(4668913-4670589) | 334-558       | pEGFP-C1                 |
|                                     |                                |               |                          |
| Tir <sub>HEC</sub> C-terminus       | NC_002655                      | 385-558       | pAG416GAL- $\mu$ NS-ccdB |
| Tir <sub>HEC</sub> C-terminus       | NPY->AAA                       | 385-558       | pAG416GAL- $\mu$ NS-ccdB |
| I-BAR <sub>IRTKS</sub> wt           | NM_018842.4                    | as above      | pAG415GAL-GFP-ccdB       |
| I-BAR <sub>IRTKS</sub> L27E         | derivative of above            | as above      | pAG415GAL-GFP-ccdB       |
| I-BAR <sub>IRTKS</sub> K107A        | derivative of above            | as above      | pAG415GAL-GFP-ccdB       |
| I-BAR <sub>IRTKS</sub> R192S        | derivative of above            | as above      | pAG415GAL-GFP-ccdB       |
| I-BAR <sub>IRTKS</sub> F195A        | derivative of above            | as above      | pAG415GAL-GFP-ccdB       |
| I-BAR <sub>IRTKS</sub> K107A/R192S  | derivative of above            | as above      | pAG415GAL-GFP-ccdB       |
| I-BAR <sub>IRTKS</sub> K107A/F195A  | derivative of above            | as above      | pAG415GAL-GFP-ccdB       |

**Table S3, related to Figure 6: Potential NPY-containing interactors of I-BAR proteins**

| Short name            | Full name                                                     | HGNC  | NPY position      | NPY location                     | Protein class                     |
|-----------------------|---------------------------------------------------------------|-------|-------------------|----------------------------------|-----------------------------------|
| <b>PK3CB</b>          | Pi3K, p110b, Phosphatidylinositol-3 kinase, catalytic subunit | 8976  | 482-84            | C2 domain                        | phospholipid kinase               |
| <b>ROCK2</b>          | Rho-associated protein kinase 2                               | 10252 | 1195-97           | very C-terminus                  | protein kinases                   |
| <b>LIMK1 &amp; -2</b> | LIM domain kinase 1                                           | 6613  | 512-14            | kinase domain                    |                                   |
| <b>ITSN1 &amp; -2</b> | Intersectin 1 (Cdc42 GEF)                                     | 6183  | 1618-20           | C2 domain                        | regulators of Rho-GTPase activity |
| <b>ARHGAP10</b>       | GRAF2 GAP10 associated with FAK (RhoA, Cdc42)                 | 26099 | 625-27            | between Rho-GAP and SH3          |                                   |
| <b>Myo IA</b>         | Brush border myosin 1 /BBM-I                                  | 7595  | 49-51             | head domain                      | myosins                           |
| <b>Myo X</b>          | Myosin 10 (filopodia)                                         | 7593  | 104-06            | head domain                      |                                   |
| <b>MyoXV</b>          | Myosin 15 (stereocilia)                                       | 7594  | 423-25<br>1263-65 | head domain NT<br>head domain CT |                                   |
| <b>CLAP1 &amp; -2</b> | CLIP115 associated protein1                                   | 17088 | 1265-67           | CLIP-binding site                | microtubule tip proteins          |
| <b>SHANK2</b>         | SH3 and multiple ankyrin repeat domains protein 2             | 14295 | 608-10            | central part                     | partners of IRSp53                |
| <b>BAI2</b>           | Brain-specific inhibitor of angiogenesis 2 (GPCR)             | 944   | 1417-19           | cytoplasmic tail                 |                                   |

The SwissProt database comprises 20,329 human proteins, of which 749 contain the NPY motif as detected using Scansite ([http://scansite.mit.edu/dbsequence\\_one.html](http://scansite.mit.edu/dbsequence_one.html)). Candidates that potentially might interact with I-BAR domains of IRSp53 or IRTKS were selected according to the following criteria: (i) nuclear, intraluminal or extracellular motifs are excluded; (ii) the motif is conserved at least between human and mouse orthologs and (iii) conservation between paralogs is preferred. The selection shown in Table S1 was further confined based on involvement in IRSp53-signalling (e.g. Shank), in cytoskeleton reorganisation (e.g. LIMK), in Rho-GTPase signalling (Intersectin), and for those that were implicated in filopodium (or similar like stereocilia/microvilli, e.g. Myosin X) formation before.

## Supplemental Experimental Procedures

### Plasmids

A PCR fragment encoding amino acids 1-250 (MSLS...VASN) of human IRSp53 (SwissProt BAIP2\_HUMAN) was obtained from a GST-IRSp53-I-BAR clone (Weiss et al., 2009) and cloned with BamHI and NotI into pQTEV (GenBank AY243506), resulting in I-BAR<sub>IRSp53</sub> fused to an N-terminal His<sub>7</sub>-tag and TEV cleavage site with the sequence GSTMSLS...VASN upon cleavage. Mutations were introduced by site directed mutagenesis (QuikChange kit, Stratagene). All primers are listed in the Table S1 and S2. Wild type and mutant I-BARs of IRSp53 were subcloned to pEGFP-C1 (Clontech) using BglII and Bsp120I. TirC of EHEC O157:H7 strain EDL933 (aa 337-558) (Griffin et al., 1988) and EPEC O127:H6 strain E2348/69 (aa 334-550) (Levine et al., 1978) were described (Weiss et al., 2009). For PIP assays (Schmitz et al., 2009), EHEC TirC (aa 385-558) the corresponding TirC NPY<sub>458</sub>→AAA<sub>458</sub> mutant, and the I-BAR domain of human IRTKS (SwissProt BI2L1\_HUMAN, aa 1-250) were amplified by PCR using primers flanked by attB recombination sites and were introduced in pDONR221 to create Gateway entry vectors (Invitrogen) *via* BP reactions. Inserts were sequenced and transferred *via* LR reactions (Invitrogen) into Gateway destination vectors pAG416GAL-μNS-ccdB (Schmitz et al., 2009) and pAG415GAL-GFP-ccdB (Alberti et al., 2007) to create μNS-TirC, μNS-TirC AAA<sub>458</sub> and GFP-I-BAR<sub>IRTKS</sub> fusions,

respectively. Mutations were generated in I-BAR<sub>IRTKS</sub> by inverse PCR following the SLIM methodology (Chiu et al., 2004) and using the entry clone pDONR221-I-BAR<sub>IRTKS</sub> as template. After sequencing, I-BAR domain mutant genes were transferred in plasmid pAG415GAL-GFP-ccdB *via* LR reactions.

## Supplemental References

Alberti, S., Gitler, A.D., and Lindquist, S. (2007). A suite of Gateway cloning vectors for high-throughput genetic analysis in *Saccharomyces cerevisiae*. *Yeast* 24, 913-919.

Chiu, J., March, P.E., Lee, R., and Tillett, D. (2004). Site-directed, Ligase-Independent Mutagenesis (SLIM): a single-tube methodology approaching 100% efficiency in 4 h. *Nucl Acids Res* 32, e174-.

Griffin, P.M., Ostroff, S.M., Tauxe, R.V., Greene, K.D., Wells, J.G., Lewis, J.H., and Blake, P.A. (1988). Illnesses associated with *Escherichia coli* O157:H7 infections. A broad clinical spectrum. *Annals of internal medicine* 109, 705-712.

Levine, M.M., Bergquist, E.J., Nalin, D.R., Waterman, D.H., Hornick, R.B., Young, C.R., and Sotman, S. (1978). *Escherichia coli* strains that cause diarrhoea but do not produce heat-labile or heat-stable enterotoxins and are non-invasive. *Lancet* 1, 1119-1122.

Millard, T.H., Bompard, G., Heung, M.Y., Dafforn, T.R., Scott, D.J., Machesky, L.M., and Fütterer, K. (2005). Structural basis of filopodia formation induced by the IRSp53/MIM homology domain of human IRSp53. *Embo J* 24, 240-250.

Schmitz, A.M., Morrison, M.F., Agunwamba, A.O., Nibert, M.L., and Lesser, C.F. (2009). Protein interaction platforms: visualization of interacting proteins in yeast. *Nat Meth* 6, 500-502.

Weiss, S.M., Ladwein, M., Schmidt, D., Ehinger, J., Lommel, S., Städing, K., Beutling, U., Disanza, A., Frank, R., Jänsch, L., *et al.* (2009). IRSp53 links the enterohemorrhagic *E. coli* effectors Tir and EspF<sub>U</sub> for actin pedestal formation. *Cell Host Microbe* 5, 244-258.
